# Supplementary material
Source: PubMed Central journal article supplement (PMC3545050)

# **R4 regulators of G protein signaling (RGS) identify a conserved genomic region that contains MHC-related markers**

**Jaanus Suurväli<sup>1</sup>, Jacques Robert<sup>2</sup>, Pierre Boudinot<sup>3</sup> and Sirje Rüütel Boudinot<sup>1</sup>**

<sup>1</sup>Department of Gene Technology, Tallinn University of Technology, Akadeemia tee 15, 12618 Tallinn, Estonia

<sup>2</sup> Department of Microbiology and Immunology, University of Rochester Medical Center, Rochester, NY 14642

<sup>3</sup> INRA, Molecular Virology and Immunology, Domaine de Vilvert, 78350 Jouy en Josas, France

Corresponding author:

Jaanus Suurväli

Tallinn University of Technology

Department of Gene Technology

Akadeemia tee 15, 12618 Tallinn, Estonia

phone: +372 620 4447

fax: +372 620 4401

e-mail: jaanus.suurvali@ttu.ee

## Online Resource 1.

This file consists of several parts to complement Figure 1.

**Online Resource 1A** contains links to PhylomeDB entries (<http://phylomedb.org/>) for the human RGS1/RGS16 region genes, which can provide some evidence for the orthology relationships shown on Figure 1.

**Online Resource 1B** contains a Maximum Likelihood phylogeny constructed with 1000 bootstrap replicates for the NOTCH2 genes from human, mouse, anole lizard, chicken, frog, medaka and stickleback. This provides the phylogenetic evidence to make claims about the location of NOTCH2 gene in several species of Figure 1 as NOTCH contains many EGF repeats in addition to NOTCH domain itself.

**Online Resource 1C** contains a Maximum Likelihood phylogeny constructed with 1000 bootstrap replicates for the R4 RGS genes found in human, mouse, anole lizard, chicken, frog, medaka, stickleback and one additional sequence from the amphioxus *Branchiostoma floridae*. This tree shows that the RGS genes indicated on Figure 1 are indeed all related to the R4 RGS genes on human chromosome 1.

**Online Resource 1D** shows the Genomicus Phyloview centered on Homo sapiens MR1, as MR1 has too many co-orthologs in some species to fit on Figure 1.

**Online Resource 1A.** PhylomeDB (<http://phylomedb.org/>)  
phylogenies for human RGS1/RGS16 region genes

| Gene name | Link to PhylomeDB                                                                                                               |
|-----------|---------------------------------------------------------------------------------------------------------------------------------|
| NEK7      | <a href="http://phylomedb.org/?q=search_tree&amp;seqid=nek7">http://phylomedb.org/?q=search_tree&amp;seqid=nek7</a>             |
| LHX9      | <a href="http://phylomedb.org/?q=search_tree&amp;seqid=lxh9">http://phylomedb.org/?q=search_tree&amp;seqid=lxh9</a>             |
| C1orf53   | -                                                                                                                               |
| DENND1B   | <a href="http://phylomedb.org/?q=search_tree&amp;seqid=phy0007zbt">http://phylomedb.org/?q=search_tree&amp;seqid=phy0007zbt</a> |
| CRB1      | <a href="http://phylomedb.org/?q=search_tree&amp;seqid=crb1">http://phylomedb.org/?q=search_tree&amp;seqid=crb1</a>             |
| ZBTB41    | <a href="http://phylomedb.org/?q=search_tree&amp;seqid=phy0007zbp">http://phylomedb.org/?q=search_tree&amp;seqid=phy0007zbp</a> |
| ASPM      | <a href="http://phylomedb.org/?q=search_tree&amp;seqid=aspm">http://phylomedb.org/?q=search_tree&amp;seqid=aspm</a>             |
| F13B      | <a href="http://phylomedb.org/?q=search_tree&amp;seqid=f13b">http://phylomedb.org/?q=search_tree&amp;seqid=f13b</a>             |
| CFHR5     | <a href="http://phylomedb.org/?q=search_tree&amp;seqid=cfhr5">http://phylomedb.org/?q=search_tree&amp;seqid=cfhr5</a>           |
| CFHR2     | <a href="http://phylomedb.org/?q=search_tree&amp;seqid=cfhr2">http://phylomedb.org/?q=search_tree&amp;seqid=cfhr2</a>           |
| CFHR4     | <a href="http://phylomedb.org/?q=search_tree&amp;seqid=cfhr4">http://phylomedb.org/?q=search_tree&amp;seqid=cfhr4</a>           |
| CFHR1     | <a href="http://phylomedb.org/?q=search_tree&amp;seqid=cfhr1">http://phylomedb.org/?q=search_tree&amp;seqid=cfhr1</a>           |
| CFHR3     | <a href="http://phylomedb.org/?q=search_tree&amp;seqid=cfhr3">http://phylomedb.org/?q=search_tree&amp;seqid=cfhr3</a>           |
| CFH       | <a href="http://phylomedb.org/?q=search_tree&amp;seqid=cfh">http://phylomedb.org/?q=search_tree&amp;seqid=cfh</a>               |
| KCNT2     | <a href="http://phylomedb.org/?q=search_tree&amp;seqid=kcnt2">http://phylomedb.org/?q=search_tree&amp;seqid=kcnt2</a>           |
| B3GALT2   | <a href="http://phylomedb.org/?q=search_tree&amp;seqid=Phy0009NTD">http://phylomedb.org/?q=search_tree&amp;seqid=Phy0009NTD</a> |
| CDC73     | <a href="http://phylomedb.org/?q=search_tree&amp;seqid=Phy0009NTC">http://phylomedb.org/?q=search_tree&amp;seqid=Phy0009NTC</a> |
| GLRX2     | <a href="http://phylomedb.org/?q=search_tree&amp;seqid=glrx2">http://phylomedb.org/?q=search_tree&amp;seqid=glrx2</a>           |
| TROVE2    | <a href="http://phylomedb.org/?q=search_tree&amp;seqid=TROVE2">http://phylomedb.org/?q=search_tree&amp;seqid=TROVE2</a>         |
| UCHL5     | <a href="http://phylomedb.org/?q=search_tree&amp;seqid=uchl5">http://phylomedb.org/?q=search_tree&amp;seqid=uchl5</a>           |
| RGS2      | <a href="http://phylomedb.org/?q=search_tree&amp;seqid=rgs13">http://phylomedb.org/?q=search_tree&amp;seqid=rgs13</a>           |
| RGS13     | <a href="http://phylomedb.org/?q=search_tree&amp;seqid=rgs13">http://phylomedb.org/?q=search_tree&amp;seqid=rgs13</a>           |
| RGS1      | <a href="http://phylomedb.org/?q=search_tree&amp;seqid=phy0007zb1">http://phylomedb.org/?q=search_tree&amp;seqid=phy0007zb1</a> |
| RGS21     | <a href="http://phylomedb.org/?q=search_tree&amp;seqid=Phy001R7KT">http://phylomedb.org/?q=search_tree&amp;seqid=Phy001R7KT</a> |
| RGS18     | <a href="http://phylomedb.org/?q=search_tree&amp;seqid=rgs18">http://phylomedb.org/?q=search_tree&amp;seqid=rgs18</a>           |
| FAM5C     | <a href="http://phylomedb.org/?q=search_tree&amp;seqid=fam5c">http://phylomedb.org/?q=search_tree&amp;seqid=fam5c</a>           |
| PLA2G4A   | <a href="http://phylomedb.org/?q=search_tree&amp;seqid=pla2g4a">http://phylomedb.org/?q=search_tree&amp;seqid=pla2g4a</a>       |
| PTGS2     | <a href="http://phylomedb.org/?q=search_tree&amp;seqid=ptgs2">http://phylomedb.org/?q=search_tree&amp;seqid=ptgs2</a>           |
| PDC       | <a href="http://phylomedb.org/?q=search_tree&amp;seqid=pcd">http://phylomedb.org/?q=search_tree&amp;seqid=pcd</a>               |
| OCLM      | -                                                                                                                               |
| C1orf27   | -                                                                                                                               |
| TPR       | <a href="http://phylomedb.org/?q=search_tree&amp;seqid=Phy0007ZAR">http://phylomedb.org/?q=search_tree&amp;seqid=Phy0007ZAR</a> |
| PRG4      | -                                                                                                                               |
| HMCN1     | -                                                                                                                               |
| IVNS1ABP  | <a href="http://phylomedb.org/?q=search_tree&amp;seqid=Phy000CDR4">http://phylomedb.org/?q=search_tree&amp;seqid=Phy000CDR4</a> |
| SWT1      | <a href="http://phylomedb.org/?q=search_tree&amp;seqid=swt1">http://phylomedb.org/?q=search_tree&amp;seqid=swt1</a>             |
| TRMT1L    | <a href="http://phylomedb.org/?q=search_tree&amp;seqid=Phy0009NUL">http://phylomedb.org/?q=search_tree&amp;seqid=Phy0009NUL</a> |
| RNF2      | <a href="http://phylomedb.org/?q=search_tree&amp;seqid=rnf2">http://phylomedb.org/?q=search_tree&amp;seqid=rnf2</a>             |
| FAM129A   | <a href="http://phylomedb.org/?q=search_tree&amp;seqid=fam129a">http://phylomedb.org/?q=search_tree&amp;seqid=fam129a</a>       |
| EDEM3     | <a href="http://phylomedb.org/?q=search_tree&amp;seqid=Phy0007ZAH">http://phylomedb.org/?q=search_tree&amp;seqid=Phy0007ZAH</a> |
| C1orf21   | <a href="http://phylomedb.org/?q=search_tree&amp;seqid=c1orf21">http://phylomedb.org/?q=search_tree&amp;seqid=c1orf21</a>       |
| TSEN15    | <a href="http://phylomedb.org/?q=search_tree&amp;seqid=Phy0007ZAF">http://phylomedb.org/?q=search_tree&amp;seqid=Phy0007ZAF</a> |
| GLT25D2   | <a href="http://phylomedb.org/?q=search_tree&amp;seqid=Phy0007ZAD">http://phylomedb.org/?q=search_tree&amp;seqid=Phy0007ZAD</a> |
| APOBEC4   | <a href="http://phylomedb.org/?q=search_tree&amp;seqid=apobec4">http://phylomedb.org/?q=search_tree&amp;seqid=apobec4</a>       |
| RGL1      | <a href="http://phylomedb.org/?q=search_tree&amp;seqid=rgl1">http://phylomedb.org/?q=search_tree&amp;seqid=rgl1</a>             |
| ARPC5     | <a href="http://phylomedb.org/?q=search_tree&amp;seqid=arpc5">http://phylomedb.org/?q=search_tree&amp;seqid=arpc5</a>           |
| NCF2      | <a href="http://phylomedb.org/?q=search_tree&amp;seqid=ncf2">http://phylomedb.org/?q=search_tree&amp;seqid=ncf2</a>             |

| Gene name  | Link to PhylomeDB                                                                                                               |
|------------|---------------------------------------------------------------------------------------------------------------------------------|
| SMG7       | <a href="http://phylomedb.org/?q=search_tree&amp;seqid=smg7">http://phylomedb.org/?q=search_tree&amp;seqid=smg7</a>             |
| NMNAT2     | <a href="http://phylomedb.org/?q=search_tree&amp;seqid=nmnat2">http://phylomedb.org/?q=search_tree&amp;seqid=nmnat2</a>         |
| LAMC2      | <a href="http://phylomedb.org/?q=search_tree&amp;seqid=lamc2">http://phylomedb.org/?q=search_tree&amp;seqid=lamc2</a>           |
| LAMC1      | <a href="http://phylomedb.org/?q=search_tree&amp;seqid=lamc1">http://phylomedb.org/?q=search_tree&amp;seqid=lamc1</a>           |
| SHCBP1L    | <a href="http://phylomedb.org/?q=search_tree&amp;seqid=phy0007z9z">http://phylomedb.org/?q=search_tree&amp;seqid=phy0007z9z</a> |
| DHX9       | <a href="http://phylomedb.org/?q=search_tree&amp;seqid=Phy0007Z9Y">http://phylomedb.org/?q=search_tree&amp;seqid=Phy0007Z9Y</a> |
| NPL        | <a href="http://phylomedb.org/?q=search_tree&amp;seqid=np1">http://phylomedb.org/?q=search_tree&amp;seqid=np1</a>               |
| RGS8       | <a href="http://phylomedb.org/?q=search_tree&amp;seqid=rgs8">http://phylomedb.org/?q=search_tree&amp;seqid=rgs8</a>             |
| RGS16      | <a href="http://phylomedb.org/?q=search_tree&amp;seqid=rgs16">http://phylomedb.org/?q=search_tree&amp;seqid=rgs16</a>           |
| RNASEL     | <a href="http://phylomedb.org/?q=search_tree&amp;seqid=rnasel">http://phylomedb.org/?q=search_tree&amp;seqid=rnasel</a>         |
| RGSL1      | <a href="http://phylomedb.org/?q=search_tree&amp;seqid=Phy0007Z9R">http://phylomedb.org/?q=search_tree&amp;seqid=Phy0007Z9R</a> |
| TEDDM1     | <a href="http://phylomedb.org/?q=search_tree&amp;seqid=Phy0009NVK">http://phylomedb.org/?q=search_tree&amp;seqid=Phy0009NVK</a> |
| GLUL       | <a href="http://phylomedb.org/?q=search_tree&amp;seqid=Phy0009NVM">http://phylomedb.org/?q=search_tree&amp;seqid=Phy0009NVM</a> |
| ZNF648     | <a href="http://phylomedb.org/?q=search_tree&amp;seqid=Phy00089UL">http://phylomedb.org/?q=search_tree&amp;seqid=Phy00089UL</a> |
| CACNA1E    | <a href="http://phylomedb.org/?q=search_tree&amp;seqid=Phy0007Z9O">http://phylomedb.org/?q=search_tree&amp;seqid=Phy0007Z9O</a> |
| IER5       | <a href="http://phylomedb.org/?q=search_tree&amp;seqid=ier5">http://phylomedb.org/?q=search_tree&amp;seqid=ier5</a>             |
| MR1        | <a href="http://phylomedb.org/?q=search_tree&amp;seqid=mr1">http://phylomedb.org/?q=search_tree&amp;seqid=mr1</a>               |
| STX6       | <a href="http://phylomedb.org/?q=search_tree&amp;seqid=stx6">http://phylomedb.org/?q=search_tree&amp;seqid=stx6</a>             |
| AL162431.1 | -                                                                                                                               |
| KIAA1614   | <a href="http://phylomedb.org/?q=search_tree&amp;seqid=Phy0007Z9E">http://phylomedb.org/?q=search_tree&amp;seqid=Phy0007Z9E</a> |
| XPR1       | <a href="http://phylomedb.org/?q=search_tree&amp;seqid=XPR1">http://phylomedb.org/?q=search_tree&amp;seqid=XPR1</a>             |
| ACBD6      | <a href="http://phylomedb.org/?q=search_tree&amp;seqid=acbd6">http://phylomedb.org/?q=search_tree&amp;seqid=acbd6</a>           |
| LHX4       | <a href="http://phylomedb.org/?q=search_tree&amp;seqid=lx4">http://phylomedb.org/?q=search_tree&amp;seqid=lx4</a>               |
| QSOX1      | <a href="http://phylomedb.org/?q=search_tree&amp;seqid=Phy0007Z98">http://phylomedb.org/?q=search_tree&amp;seqid=Phy0007Z98</a> |
| CEP350     | <a href="http://phylomedb.org/?q=search_tree&amp;seqid=cep350">http://phylomedb.org/?q=search_tree&amp;seqid=cep350</a>         |
| TOR1AIP1   | <a href="http://phylomedb.org/?q=search_tree&amp;seqid=tor1aip1">http://phylomedb.org/?q=search_tree&amp;seqid=tor1aip1</a>     |
| AL359853.2 | -                                                                                                                               |
| TOR1AIP2   | <a href="http://phylomedb.org/?q=search_tree&amp;seqid=tor1aip2">http://phylomedb.org/?q=search_tree&amp;seqid=tor1aip2</a>     |
| FAM163A    | <a href="http://phylomedb.org/?q=search_tree&amp;seqid=fam163a">http://phylomedb.org/?q=search_tree&amp;seqid=fam163a</a>       |

# B

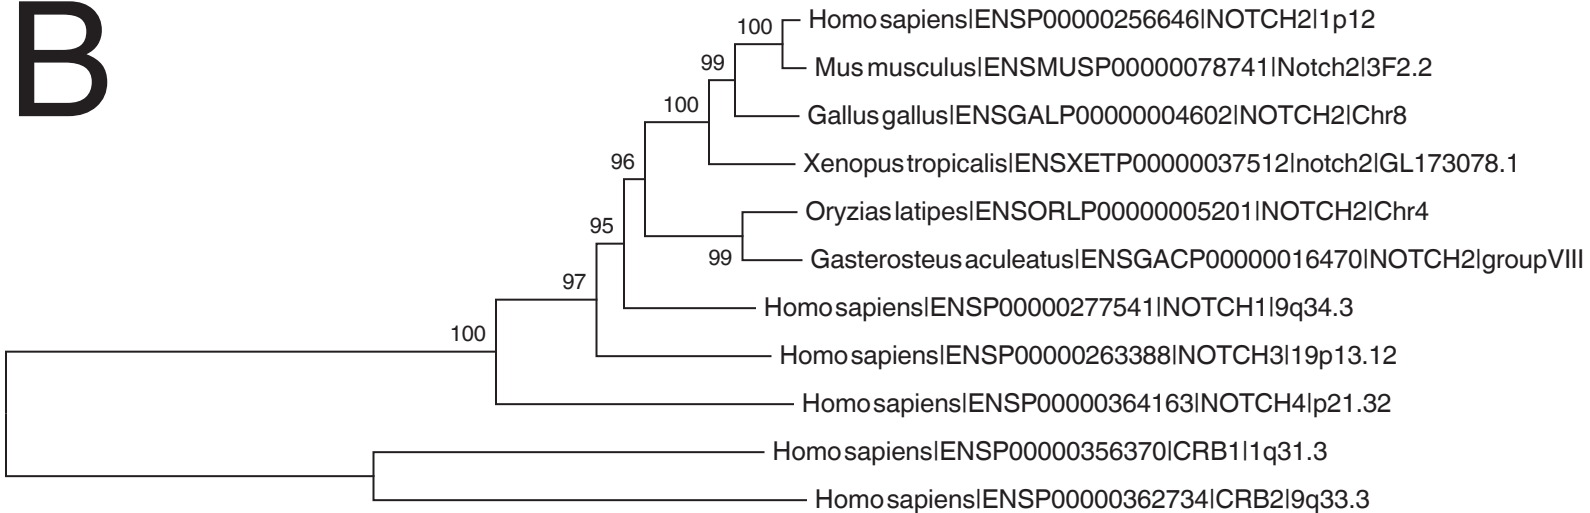

0.5

C

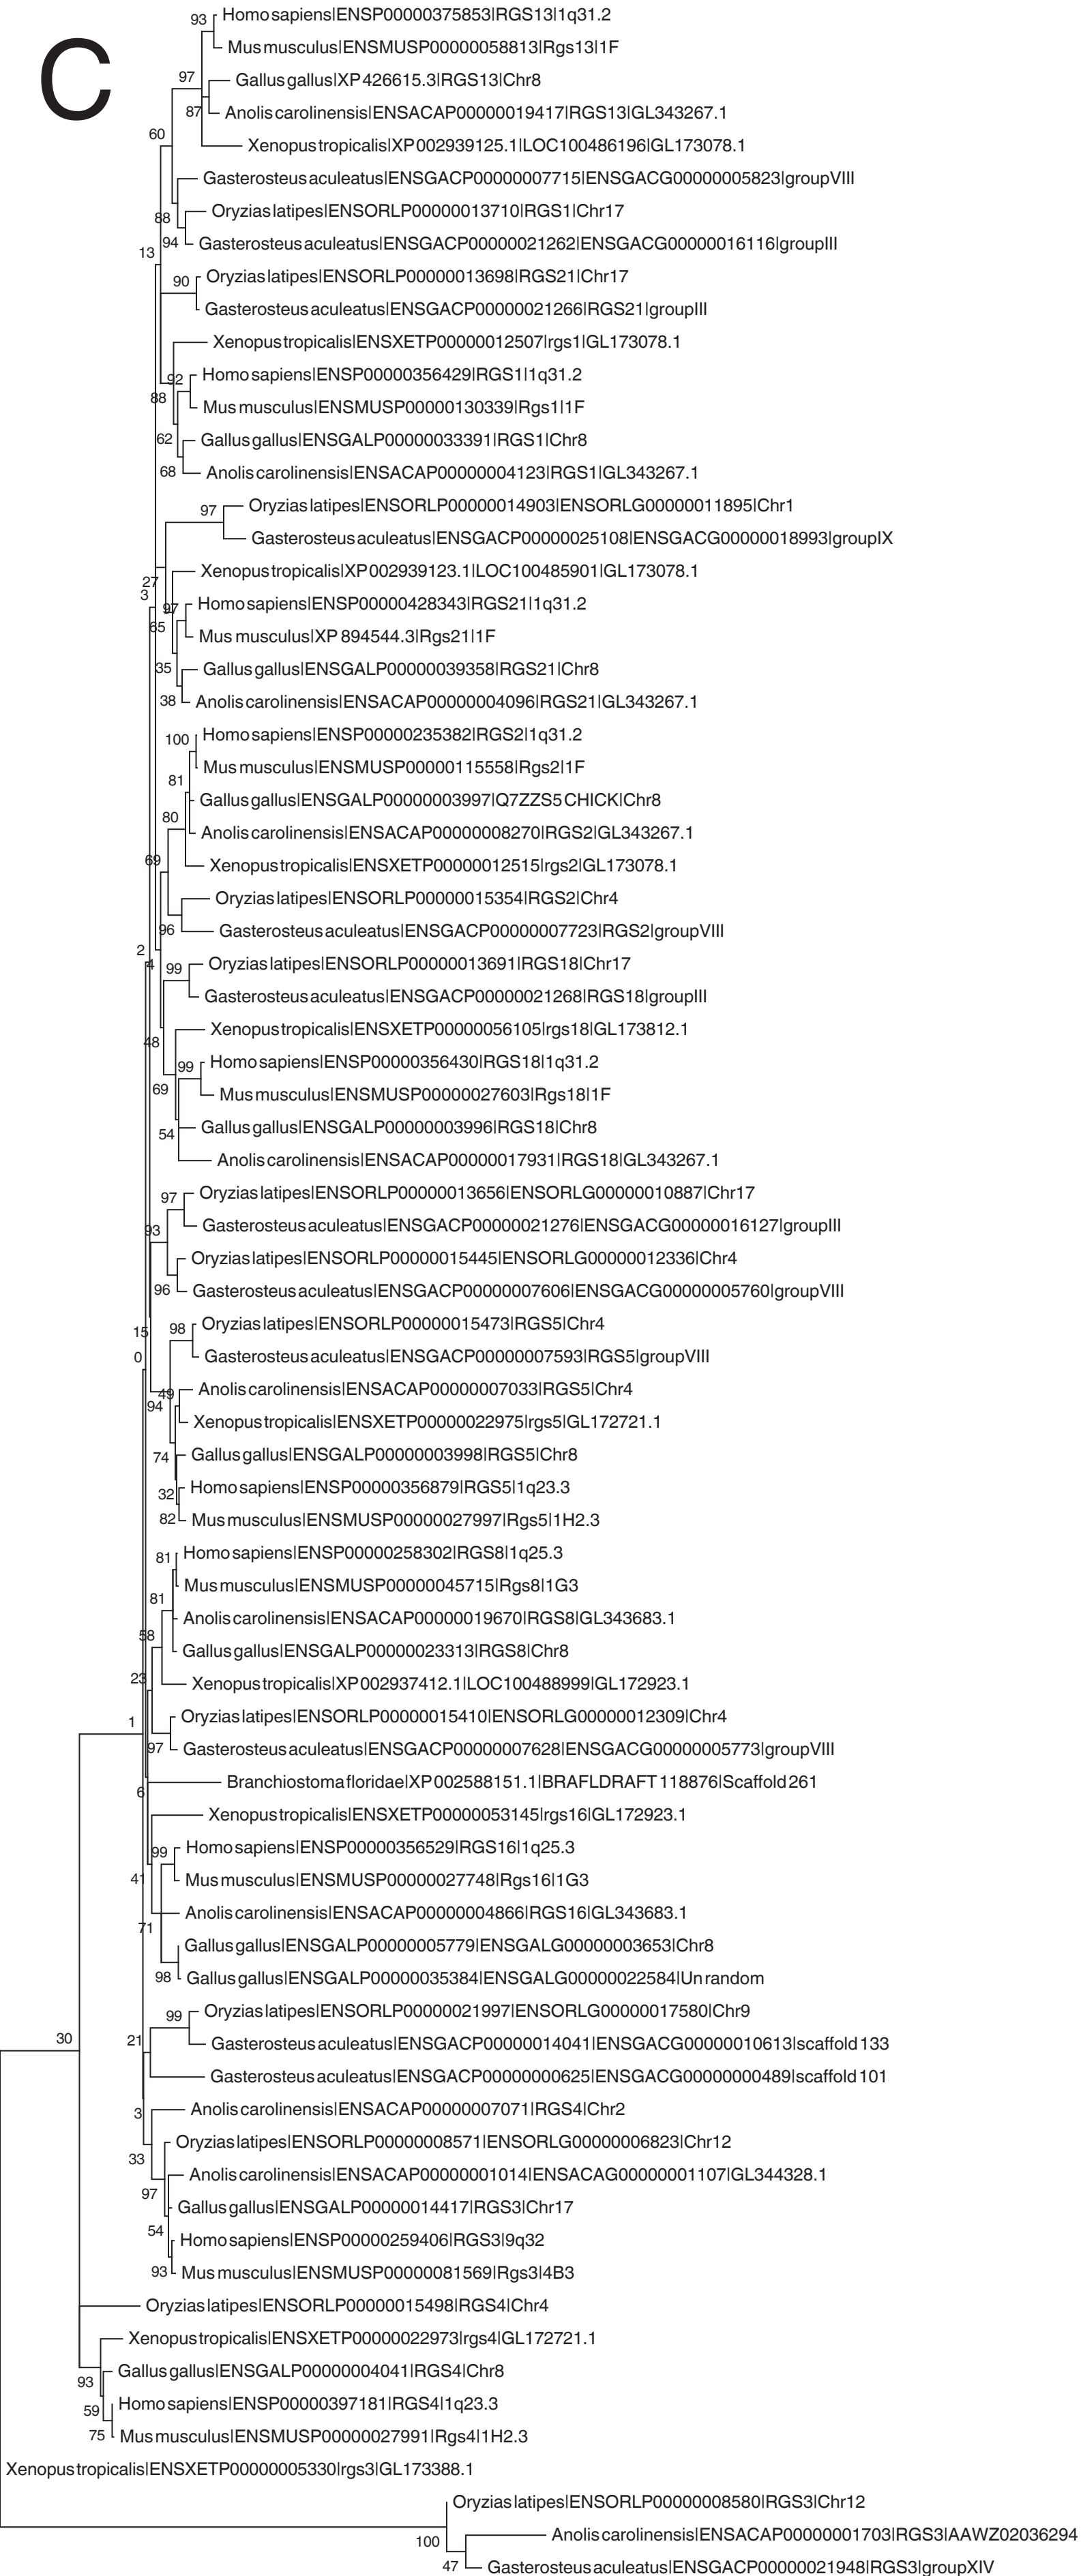

0.5

D

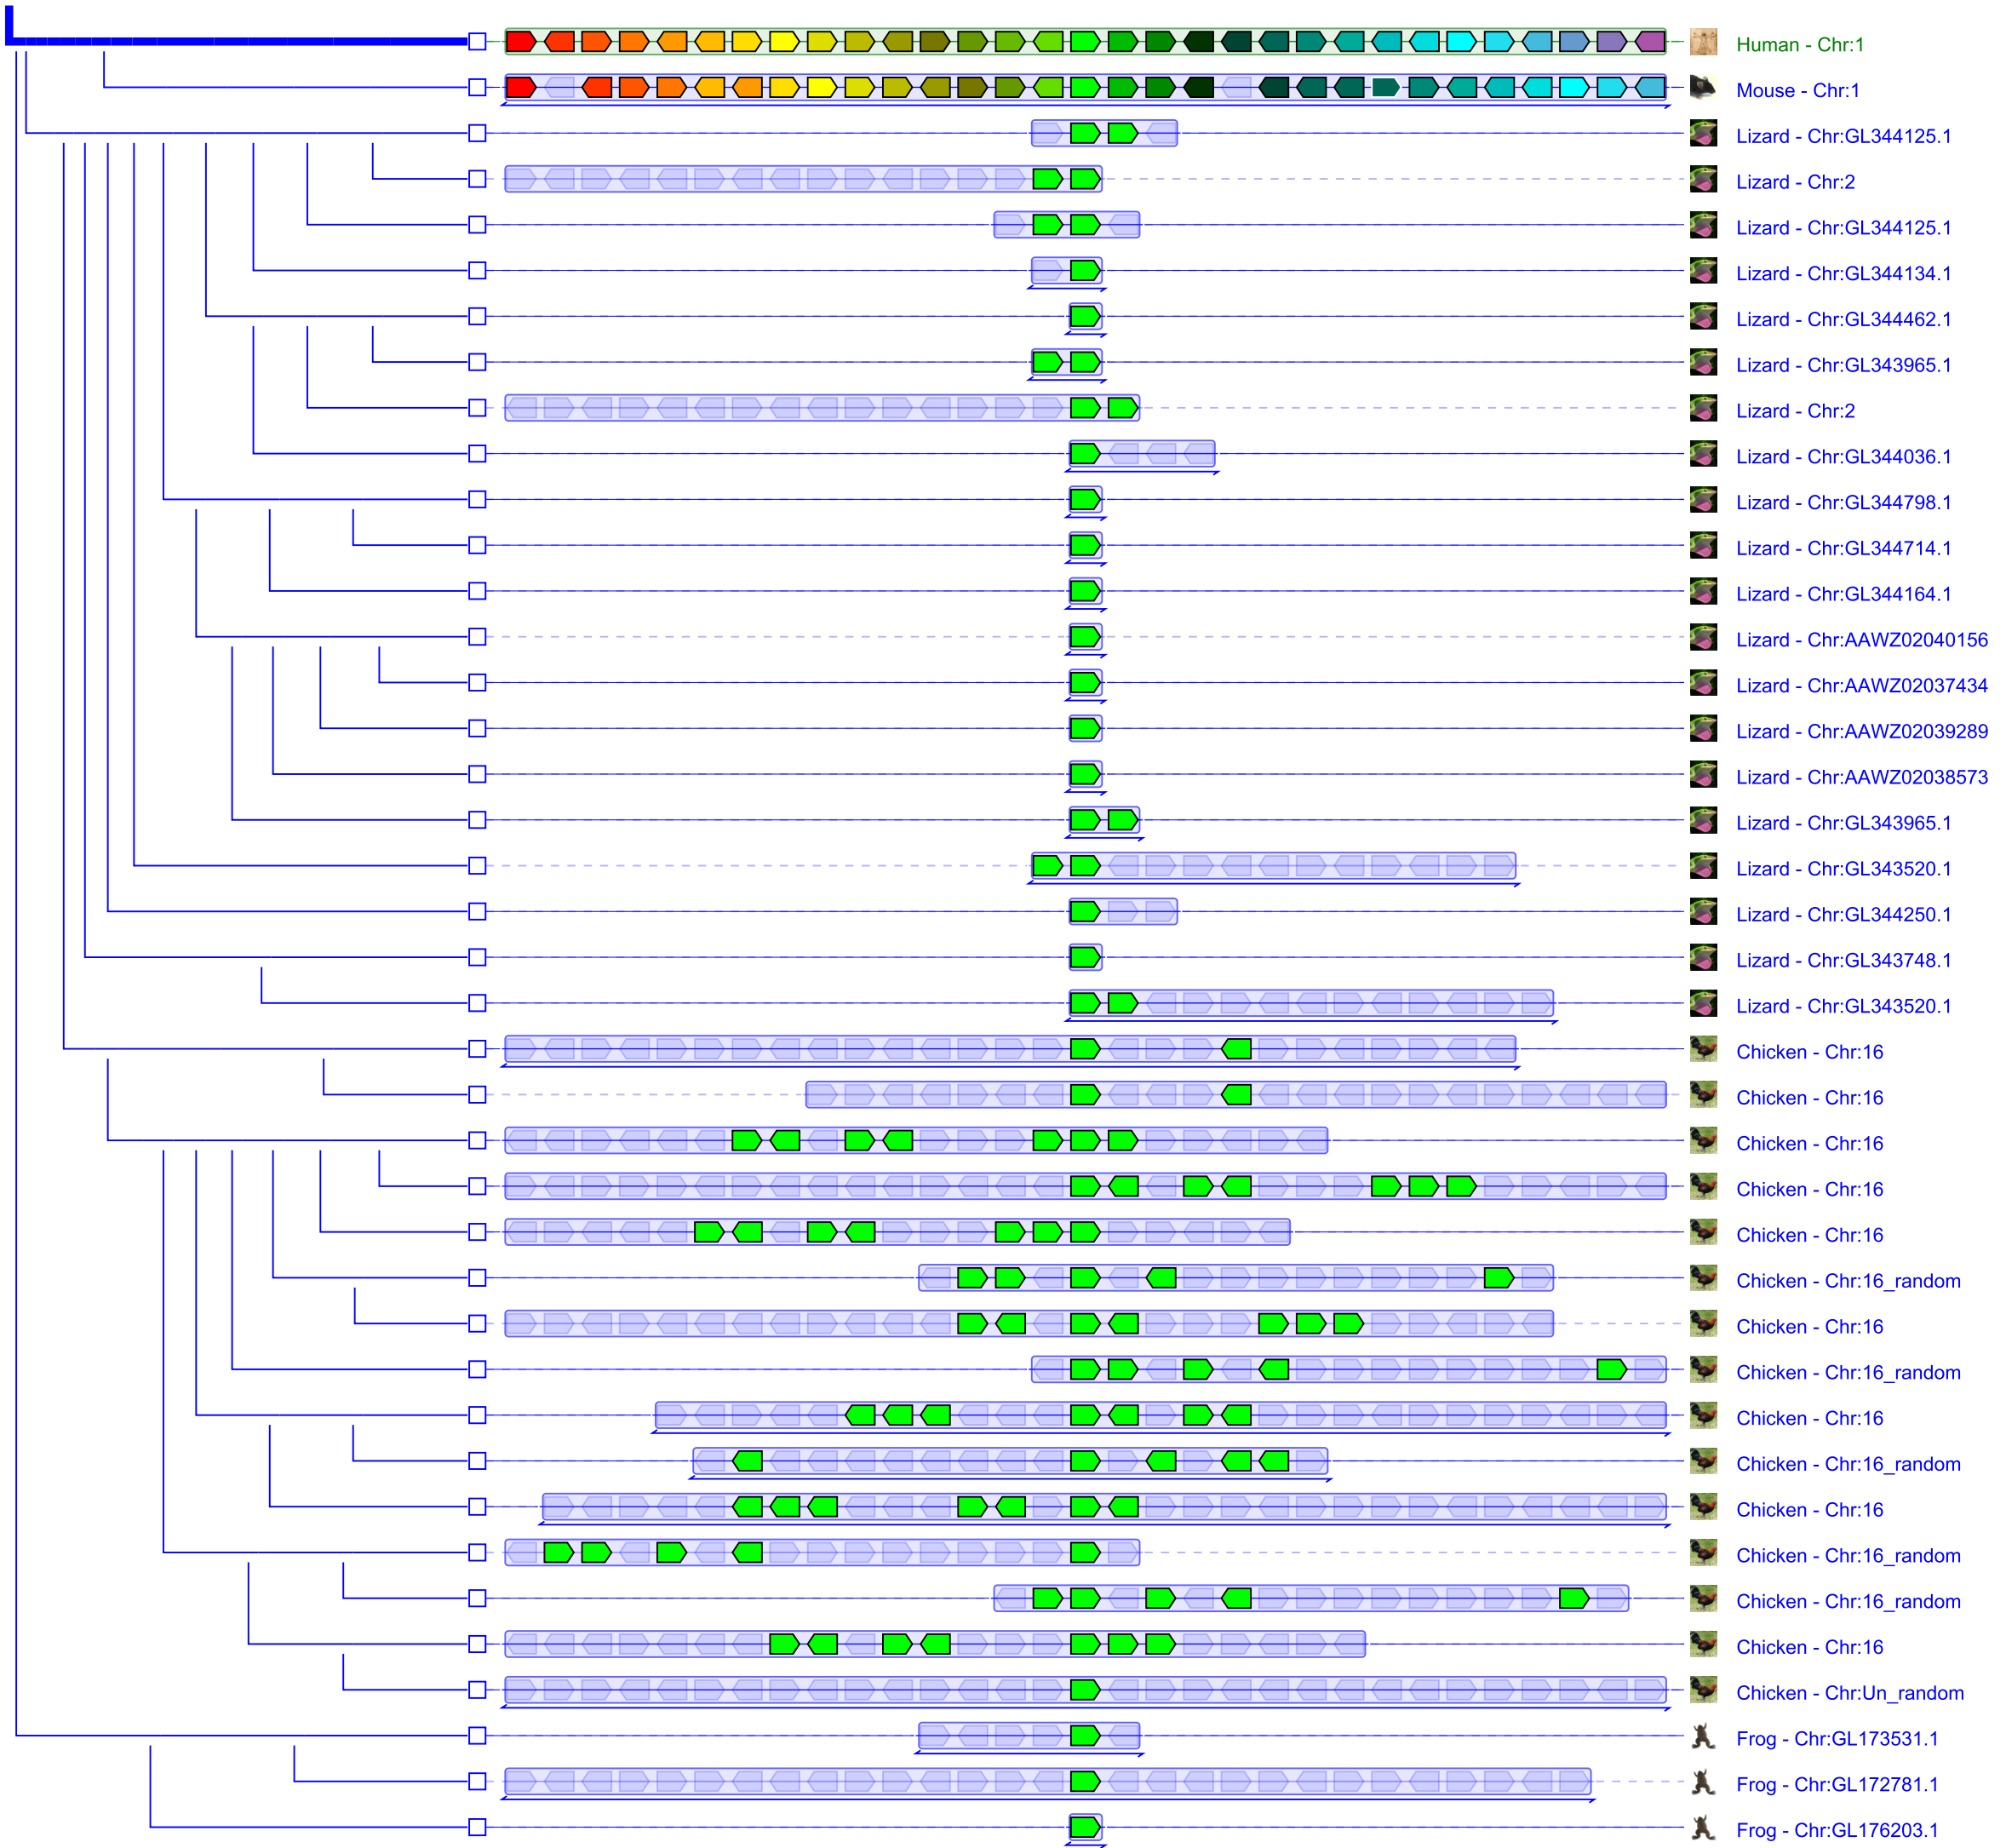

Supplement: NIHMS419773-supplement-251_2012_661_MOESM1_ESM.pdf [file NIHMS419773-supplement-251_2012_661_MOESM1_ESM.pdf]
