# Supplementary material
Source: PubMed Central journal article supplement (PMC3545050)
Supplement: NIHMS419773-supplement-251_2012_661_MOESM3_ESM.pdf [file NIHMS419773-supplement-251_2012_661_MOESM3_ESM.pdf]

# **R4 regulators of G protein signaling (RGS) identify a conserved genomic region that contains MHC-related markers**

**Jaanus Suurväli<sup>1</sup>, Jacques Robert<sup>2</sup>, Pierre Boudinot<sup>3</sup> and Sirje Rüütel Boudinot<sup>1</sup>**

<sup>1</sup>Department of Gene Technology, Tallinn University of Technology, Akadeemia tee 15, 12618 Tallinn, Estonia

<sup>2</sup> Department of Microbiology and Immunology, University of Rochester Medical Center, Rochester, NY 14642

<sup>3</sup> INRA, Molecular Virology and Immunology, Domaine de Vilvert, 78350 Jouy en Josas, France

Corresponding author:

Jaanus Suurväli

Tallinn University of Technology

Department of Gene Technology

Akadeemia tee 15, 12618 Tallinn, Estonia

phone: +372 620 4447

fax: +372 620 4401

e-mail: jaanus.suurvali@ttu.ee

### Online Resource 3.

This file contains the evidence supporting orthology relationships between the vertebrate RGS1/RGS16 region genes and their putative amphioxus orthologs as shown on Figure 3.

**Online Resource 3A** – Table with an overview of the amphioxus orthologs – such as scaffold they are located on, their EntrezGene ID, E values obtained when blasting these sequences against human and links to online phylogenetic trees in the Phylome Database <http://phylomedb.org/>.

**Online Resource 3B – 3I** contain phylogenetic evidence for RGS1/RGS16 region orthologs for which a phylogeny was not available in the Phylome Database. All of these are Maximum Likelihood trees from 1000 bootstrap replicates (as described in Materials and Methods). Sequences to build the tree were initially retrieved from Genbank (NCBI) using blastp, the dataset was completed with sequences from species such as medaka and stickleback from Ensembl as these were not available in the NCBI database. Amphioxus sequences have been marked with bold on the figures. In several cases, the amphioxus orthologs appear to be in fact co-orthologs of multiple proteins.

**Online Resource 3J-3K** – Some sequences in amphioxus had a specific domain structure only found in certain proteins – LAP1C domain in vertebrate TOR1AIP proteins or IER domain found in the MHC paralogon markers IER2, IER5 and IER5L. However, the identity of these IER-like and TOR1AIP-like sequences could not be confirmed by phylogenetic analysis. Nevertheless, they were tentatively kept for Figure 3. Online Resource 3J and 3K simply provide the domain structure of these proteins, as analyzed by InterProScan.

**Online Resource 3A.** Amphioxus orthologs of the RGS1/RGS16 region are often located on the same scaffolds as previously identified MHC marker genes (yellow) (Holland et al. 2001; Abi-Rached et al. 2002), and are co-orthologs of several ohnologs. Phylogenetic evidence is shown in the table by either a direct link to the Phylome database <http://phylomedb.org/> or can be found in this file here (Online Resource 3B-3K)

| Gene          | Amphioxus protein | Gene ID  | Scaffold # | Scaffold id    | Hits with lowest E values upon running blastp against human      | Phylogeny                  |
|---------------|-------------------|----------|------------|----------------|------------------------------------------------------------------|----------------------------|
| HMCN1         | XP_002591815.1    | 7246318  | 209        | NW_003101396.1 | 7e-170 for HMCN1, 4e-101 for HMCN2                               | Online Resource 3C         |
| ASPM          | XP_002591834.1    | 7246315  | 209        | NW_003101396.1 | E = 0 for ASPM                                                   | <a href="#">Phy000WXDI</a> |
| LHX4          | XP_002591838.1    | 7247591  | 209        | NW_003101396.1 | 1e-144 for LHX3, 2e-136 for LHX4                                 | Online Resource 3D         |
| LHX4          | XP_002591839.1    | 7247591  | 209        | NW_003101396.1 | 5e-124 for LHX3, 2e-122 for LHX4                                 | Online Resource 3D         |
| QSOX1         | XP_002591840.1    | 7246644  | 209        | NW_003101396.1 | 5e-135 for QSOX1, 2e-133 for QSOX2                               | <a href="#">Phy000WXDL</a> |
| LHX9          | XP_002592484.1    | 7223702  | 200        | NW_003101405.1 | 1e-117 for LHX9, 8e-115 for LHX2                                 | Online Resource 3D         |
| LHX9          | XP_002592485.1    | 7223703  | 200        | NW_003101405.1 | 3e-132 for LHX2, 1e-131 for LHX9                                 | Online Resource 3D         |
| CDC73         | XP_002592488.1    | 7221437  | 200        | NW_003101405.1 | E = 0 for CDC73                                                  | <a href="#">Phy000X62F</a> |
| TROVE2        | XP_002592489.1    | 7223960  | 200        | NW_003101405.1 | E = 0 for TROVE2                                                 | Online Resource 3H         |
| UCHL5         | XP_002592491.1    | 7223961  | 200        | NW_003101405.1 | 3e-148 for UCHL5                                                 | <a href="#">Phy000X7E5</a> |
| ACBD6         | XP_002592536.1    | 7221447  | 200        | NW_003101405.1 | 1e-85 for ACBD6                                                  | <a href="#">Phy000WPXC</a> |
| STX6          | XP_002592538.1    | 7223711  | 200        | NW_003101405.1 | 2e-82 for STX6, 3e-74 for STX10                                  | <a href="#">Phy000X62K</a> |
| ARPC5         | XP_002596309.1    | 7231377  | 166        | NW_003101439.1 | 7e-57 for ARPC5, 2e-51 for ARPC5L                                | <a href="#">Phy000X66H</a> |
| PSMB7, 10     | XP_002596413.1    | 7206715  | 166        | NW_003101439.1 | 3e-148 for PSMB7, 6e-117 for PSMB10                              | <a href="#">Phy000X64H</a> |
| NEK7          | XP_002596414.1    | 7206693  | 166        | NW_003101439.1 | E = 0 for NEK7, 5e-176 for NEK6                                  | <a href="#">Phy000X86N</a> |
| TRMT1L        | XP_002593682.1    | 7227130  | 192        | NW_003101413.1 | 3e-81 for TRMT1L                                                 | <a href="#">Phy000XCB0</a> |
| GLT25D2       | XP_002593693.1    | 7227132  | 192        | NW_003101413.1 | 2e-139 for GLT25D1, 2e-135 for CERCAM, 5e-135 for GLT25D2        | <a href="#">Phy000X3U2</a> |
| KCNT2         | XP_002593744.1    | 7242106  | 192        | NW_003101413.1 | E = 0 for KCNT1, E = 0 for KCNT2                                 | <a href="#">Phy000WW06</a> |
| PBX1, 2, 3, 4 | XP_002593745.1    | 7245490  | 192        | NW_003101413.1 | 2e-106 for PBX3, 4e-103 for PBX1, 1e-98 for PBX2, 7e-94 for PBX4 | <a href="#">Phy000X9HH</a> |
| SWT1          | XP_002609338.1    | 7255400  | 34         | NW_003101539.1 | 2e-55 for SWT1                                                   | Online Resource 3G         |
| IER5          | XP_002609351.1    | 7252638  | 34         | NW_003101539.1 | 3e-13 for IER5L, 1e-12 for IER5, 2e-08 for IER2                  | Online Resource 3K         |
| RXRA, B, G    | XP_002609360.1    | 7253104  | 34         | NW_003101539.1 | E = 0 for RXRA, E = 0 for RXRG, E = 0 for RXRB                   | <a href="#">Phy000XKGQ</a> |
| TOR1AIP1      | XP_002609408.1    | 7245599  | 34         | NW_003101539.1 | 2e-19 for TOR1AIP2, 5e-19 for TOR1AIP1                           | Online Resource 3J         |
| DHX9          | XP_002609434.1    | 7242207  | 34         | NW_003101539.1 | E = 0 for DHX9, 3e-177 for DHX36, 1e-152 for DHX57               | <a href="#">Phy000X9KI</a> |
| LAMC1         | XP_002609437.1    | 7241772  | 34         | NW_003101539.1 | E = 0 for LAMC1, E = 0 for LAMC3, E = 0 for LAMA1                | <a href="#">Phy000XJ7L</a> |
| DDX39A, B     | XP_002600114.1    | 7216951  | 136        | NW_003101469.1 | E = 0 for DDX39B, E = 0 for DDX39A                               | <a href="#">Phy000X70J</a> |
| TOR1AIP1      | XP_002600196.1    | 7220812  | 136        | NW_003101469.1 | 2e-21 for TOR1AIP1, 7e-18 for TOR1AIP2                           | Online Resource 3J         |
| TOR1AIP1      | XP_002600202.1    | 7219896  | 136        | NW_003101469.1 | 2e-19 for TOR1AIP1, 5e-18 for TOR1AIP2                           | Online Resource 3J         |
| RGL1          | XP_002600257.1    | 7218548  | 136        | NW_003101469.1 | 3e-136 for RGL1, 1e-111 for RGL3, 2e-93 for RALGDS               | Online Resource 3F         |
| NOTCH1,2,3,4  | CAC19873.1        | Y12539.2 | 136        | NW_003101469.1 | E = 0 for NOTCH1, 2, 3, 1e-143 for NOTCH4                        | Online Resource 3I         |
| NCF2          | XP_002600343.1    | 7226532  | 136        | NW_003101469.1 | 1e-109 for NCF2, 5e-45 for NOX1                                  | Online Resource 3E         |
| RGS R4        | XP_002588151.1    | 7220373  | 261        | NW_003101344.1 | 6e-40 for RGS4, 4e-37 for RGS3, 4e-37 for RGS8                   | <a href="#">Phy000X7D8</a> |
| C1orf21       | XP_002588199.1    | 7223664  | 261        | NW_003101344.1 | 4e-10 for C1orf21                                                | Online Resource 3B         |

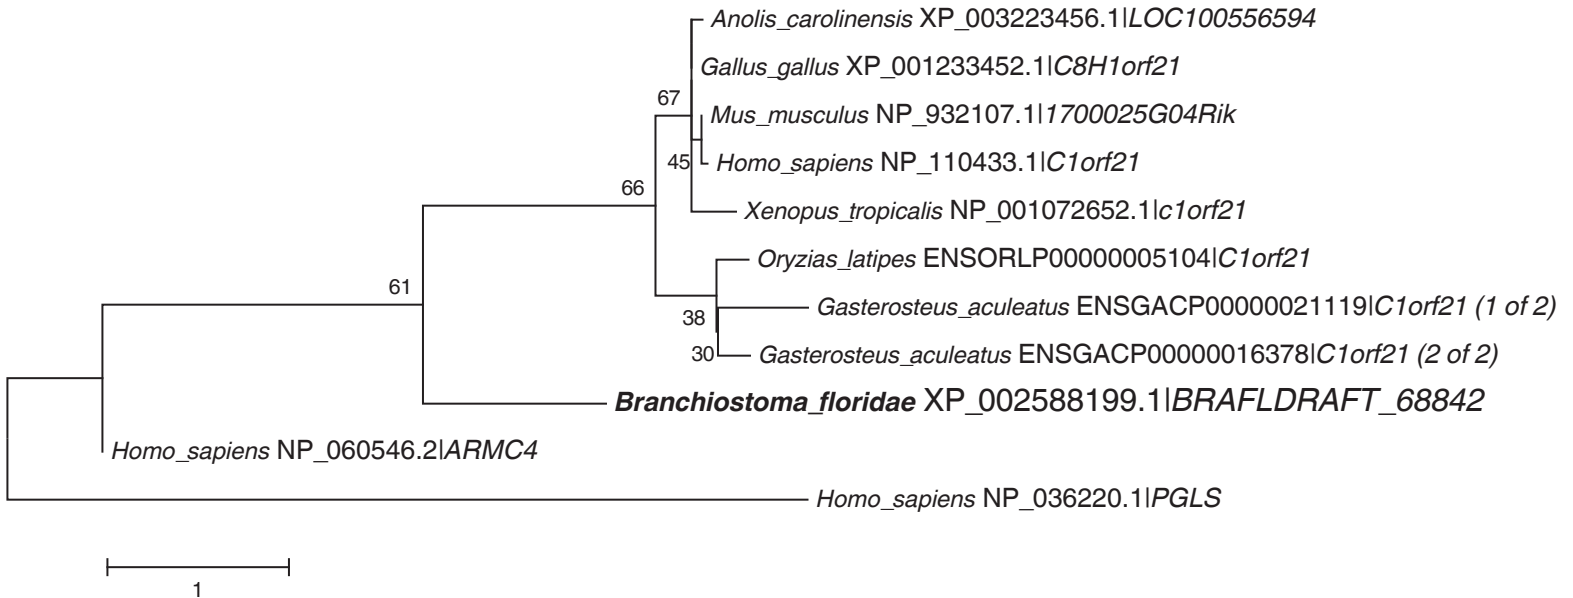

**Online Resource 3B.** Amphioxus sequence XP\_002588199.1 is orthologous to vertebrate C1orf21. This Maximum Likelihood tree was constructed with 1000 bootstrap replicates.

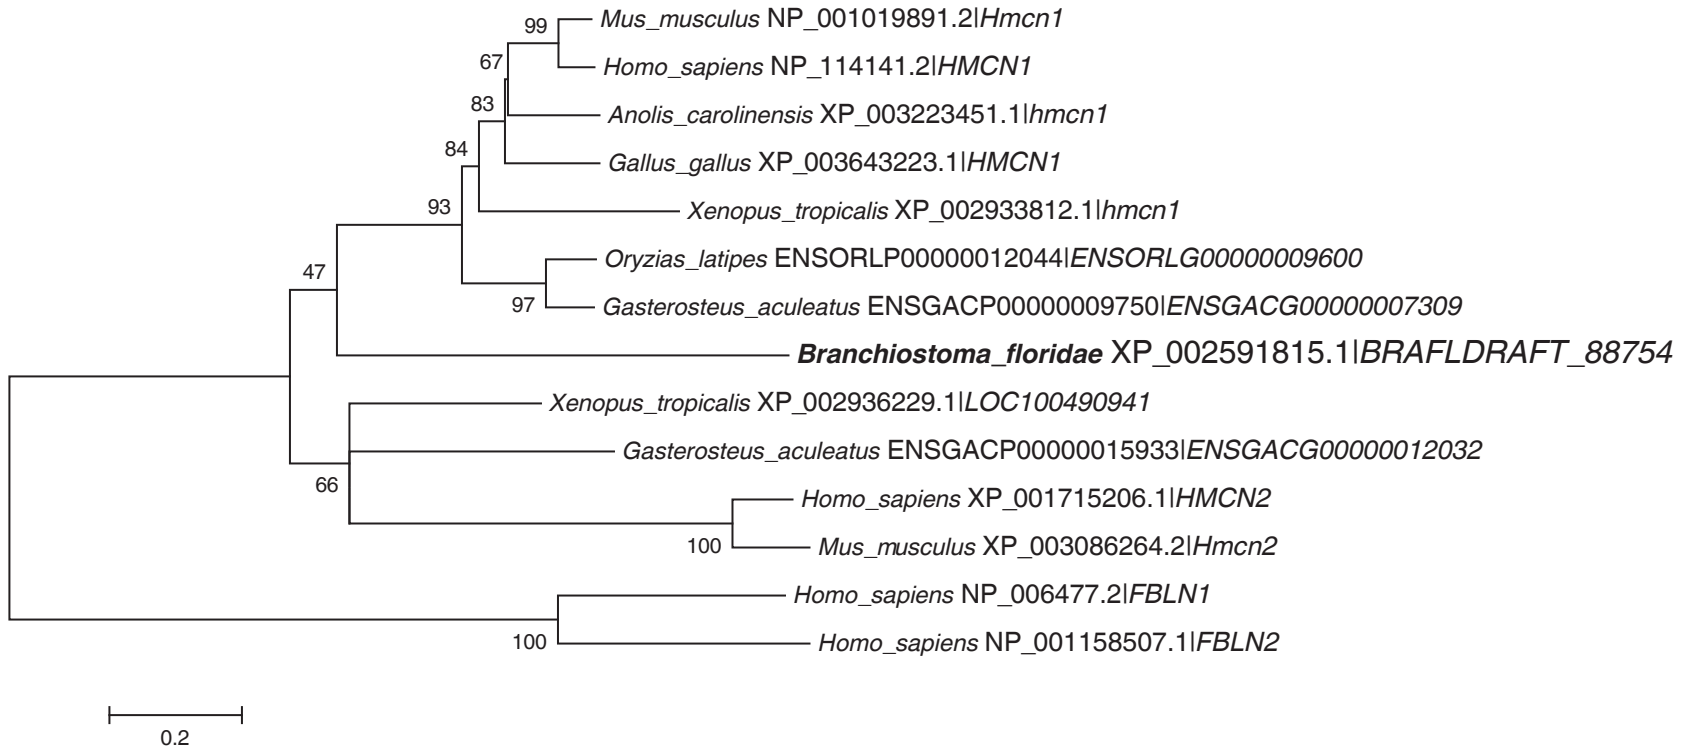

**Online Resource 3C.** Amphioxus sequence XP\_002591815.1 is orthologous to vertebrate HMCN1. This Maximum Likelihood tree was constructed with 1000 bootstrap replicates.

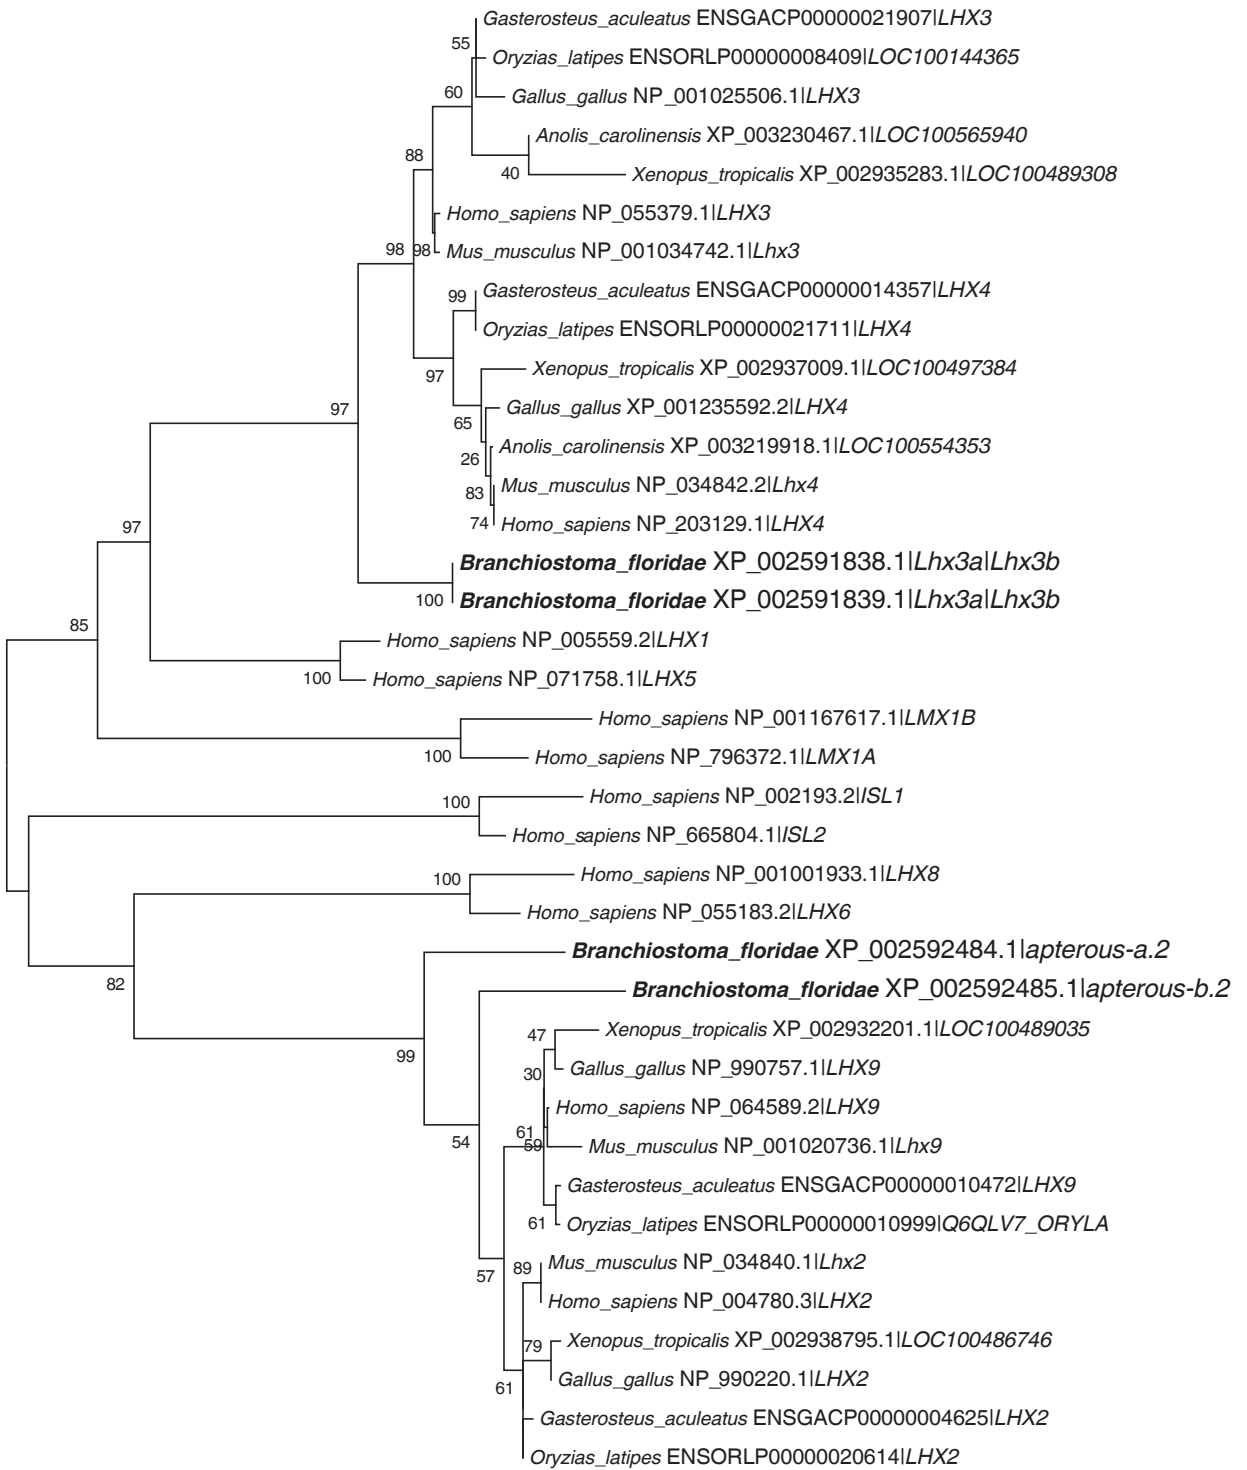

0.1

**Online Resource 3D.** Amphioxus sequences XP\_002591838.1 and XP\_002591839.1 are orthologous to vertebrate LHX4 (and LHX3). Sequences XP\_002592484.1 and XP\_002592484.1 are orthologous to vertebrate LHX9 (and LHX2). This Maximum Likelihood tree was constructed with 1000 bootstrap replicates.

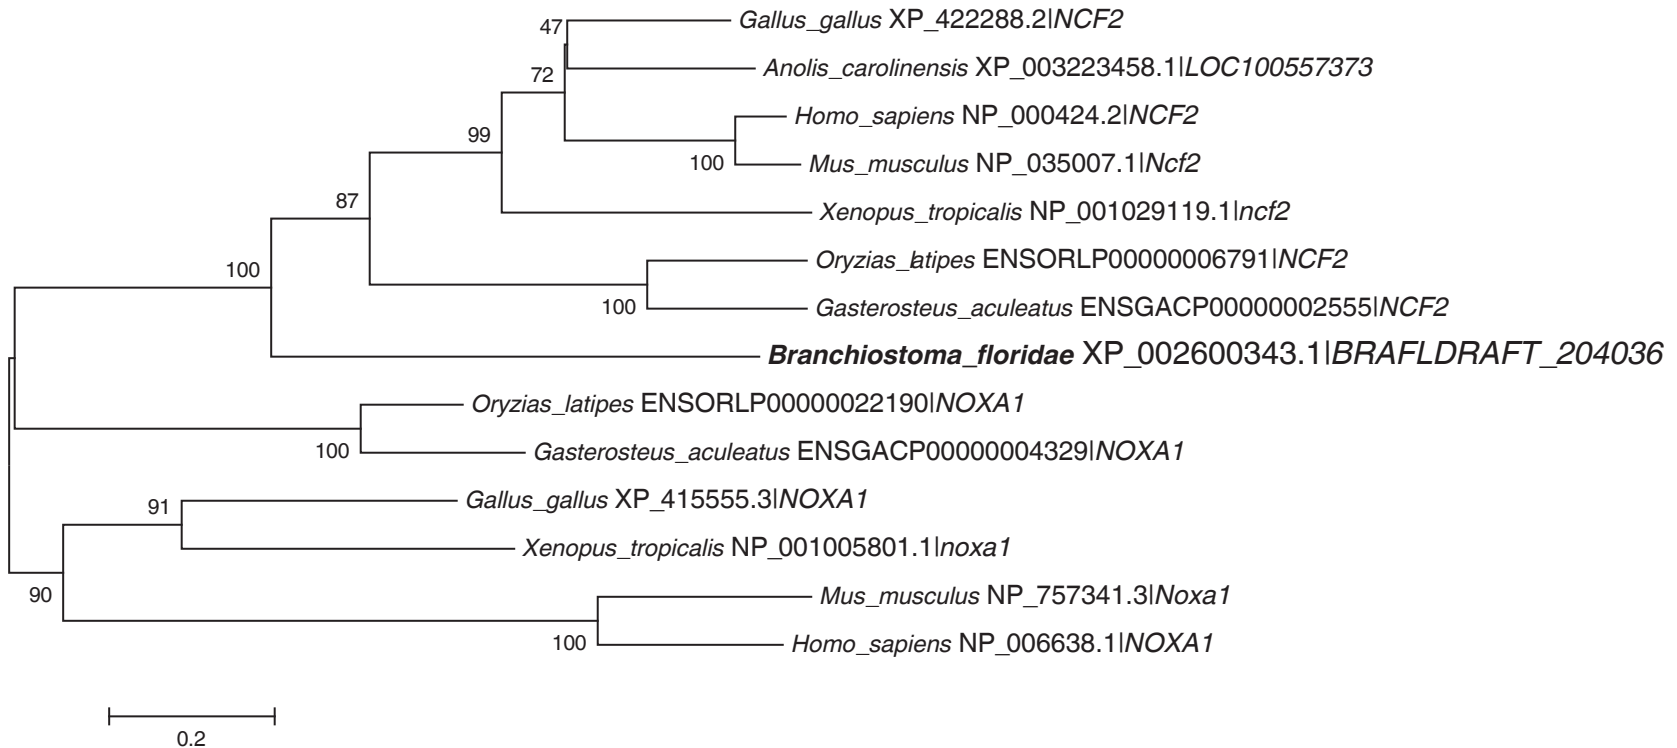

**Online Resource 3E.** Amphioxus sequence XP\_002600343.1 is orthologous to vertebrate NCF2. This Maximum Likelihood tree was constructed with 1000 bootstrap replicates.

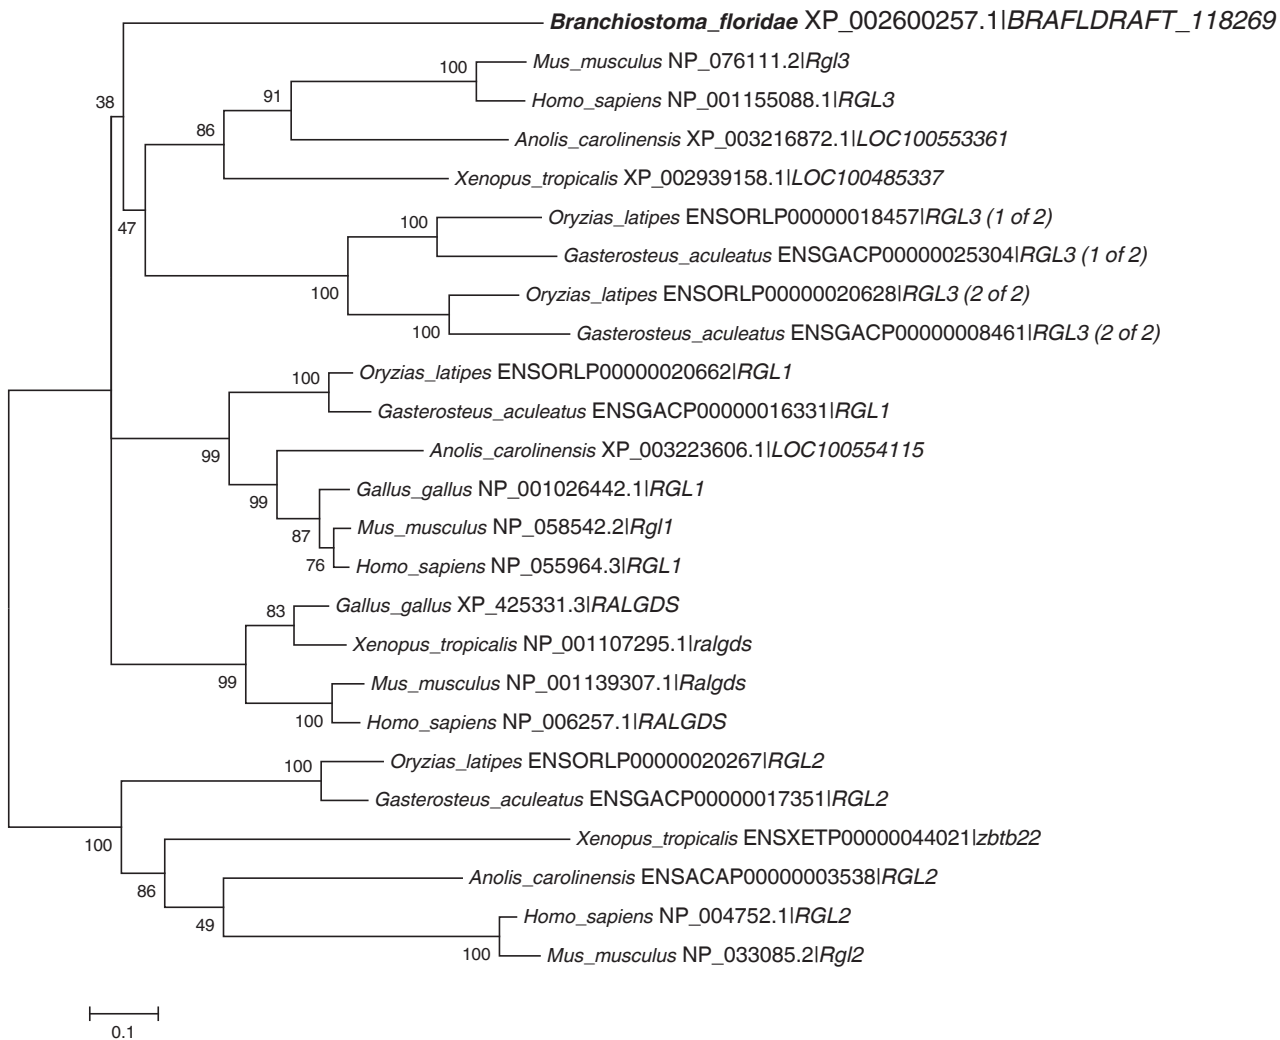

**Online Resource 3F.** Amphioxus sequence XP\_002600257.1 is orthologous to vertebrate RGL1,2,3 and RALGDS proteins. The sequence appears most similar to RGL3 and the tree has expected structure. This Maximum Likelihood tree was constructed with 1000 bootstrap replicates.



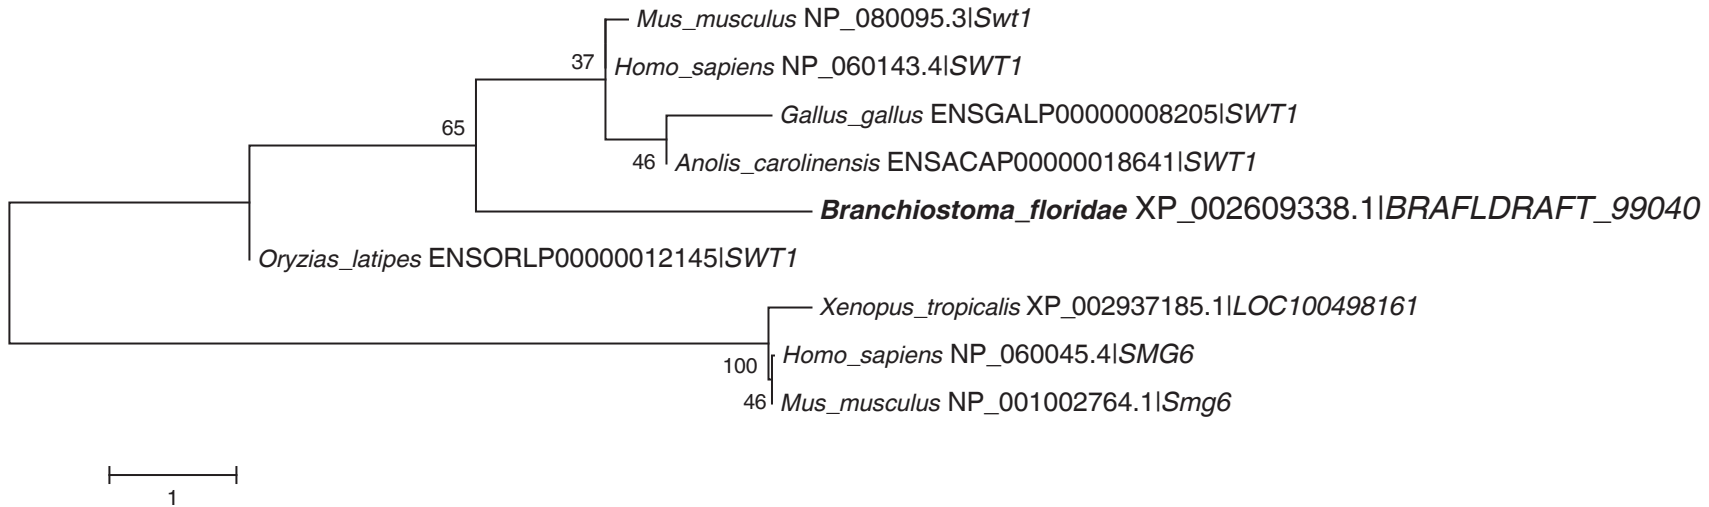

**Online Resource 3G.** Amphioxus sequence XP\_002609338.1 is orthologous to vertebrate SWT1. This Maximum Likelihood tree was constructed with 1000 bootstrap replicates.

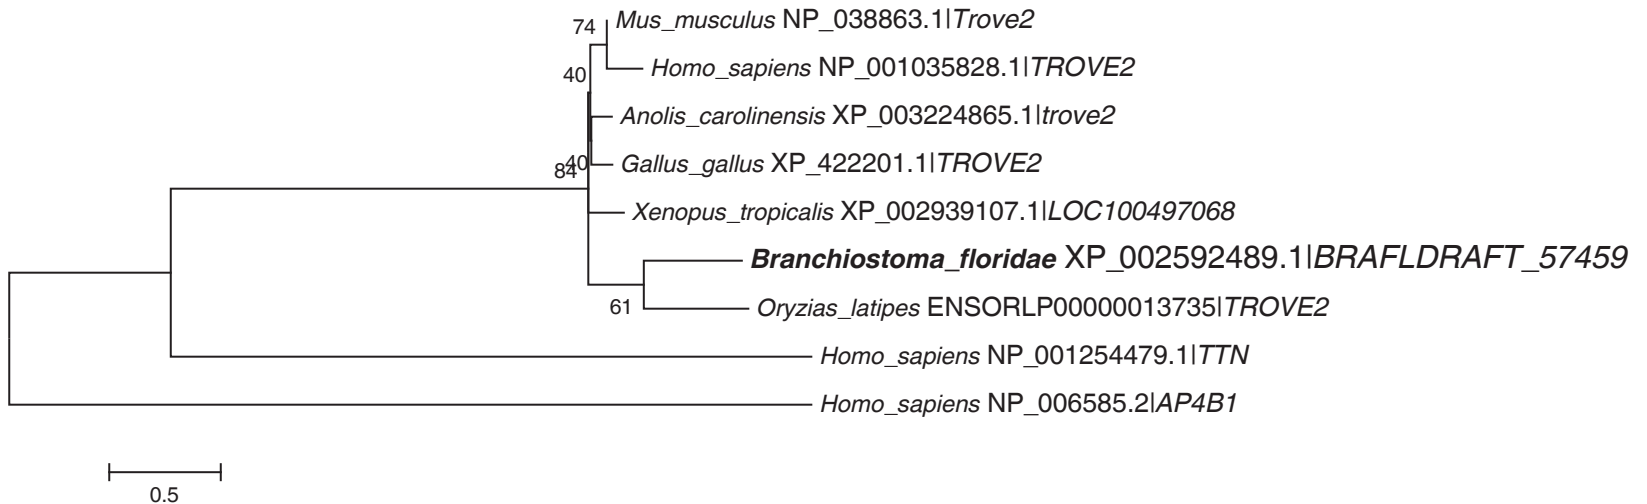

**Online Resource 3H.** Amphioxus sequence XP\_002592489.1 is orthologous to vertebrate TROVE2. This Maximum Likelihood tree was constructed with 1000 bootstrap replicates.

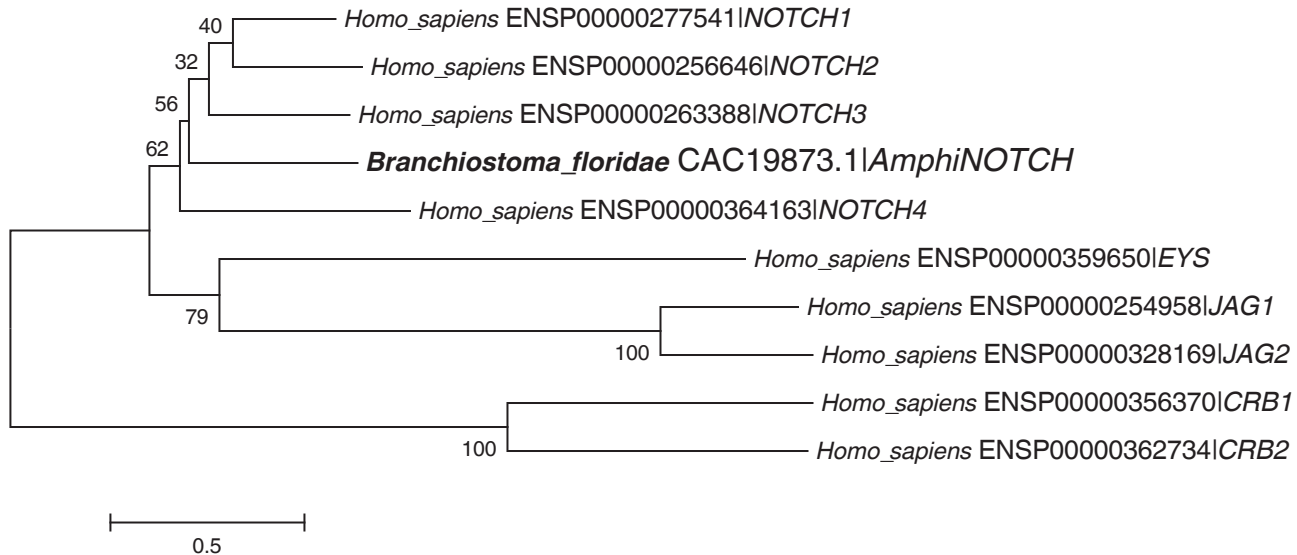

**Online Resource 3I.** Amphioxus sequence CAC19873.1 is related to the human NOTCH proteins. This Maximum Likelihood tree was constructed with 1000 bootstrap replicates.

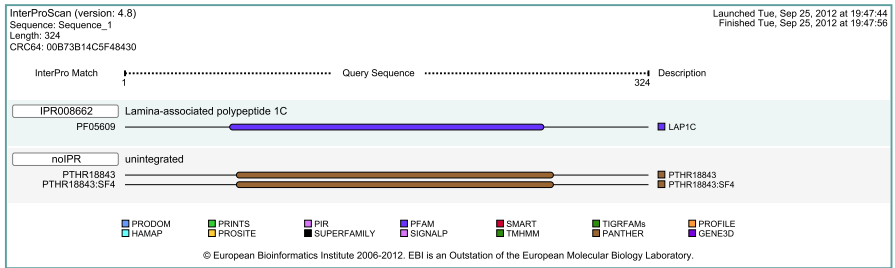

*B. floridae*  
 XP\_002600196.1  
 BRAFLDRAFT\_66701

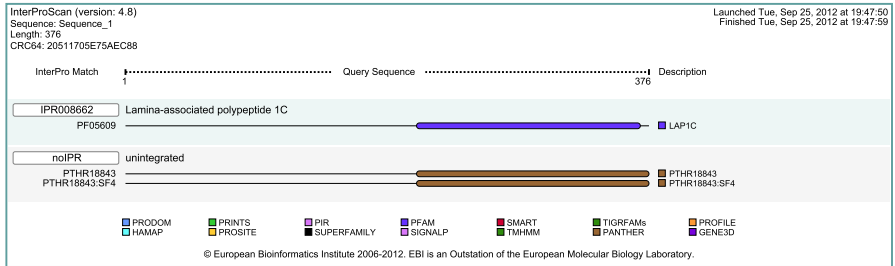

*B. floridae*  
 XP\_002600202.1  
 BRAFLDRAFT\_66707

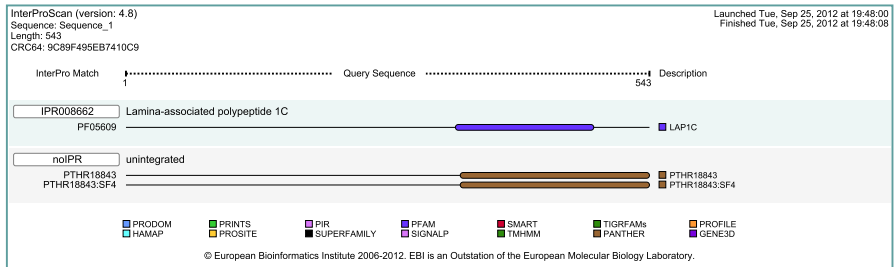

*B. floridae*  
 XP\_002609408.1  
 BRAFLDRAFT\_86510

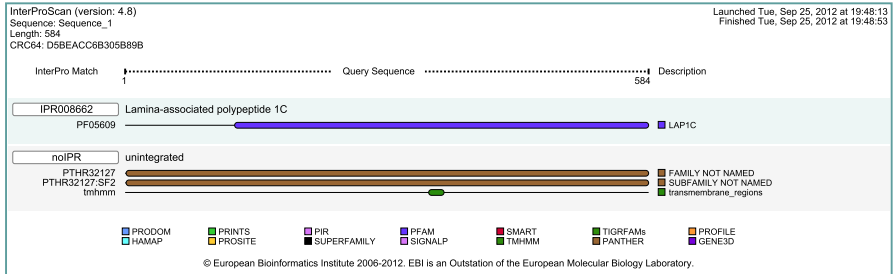

*Homo sapiens*  
 NP\_001254507.1  
 TOR1AIP1

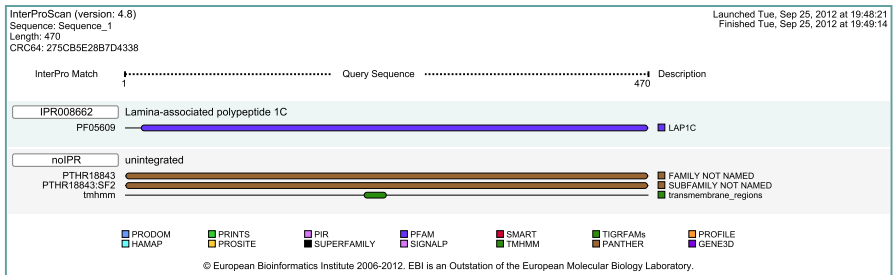

*Homo sapiens*  
 NP\_659471.1  
 TOR1AIP2

**Online Resource 3J.** Amphioxus sequences XP\_002600196.1, XP\_002600202.1 and XP\_002609408.1 share the conserved unique domain structure characteristic to the TOR1AIP proteins of *Homo sapiens* and other vertebrates, although this is not supported by phylogenetic evidence.

*B. floridae*  
 XP\_002609351.1  
 BRAFLDRAFT\_236223

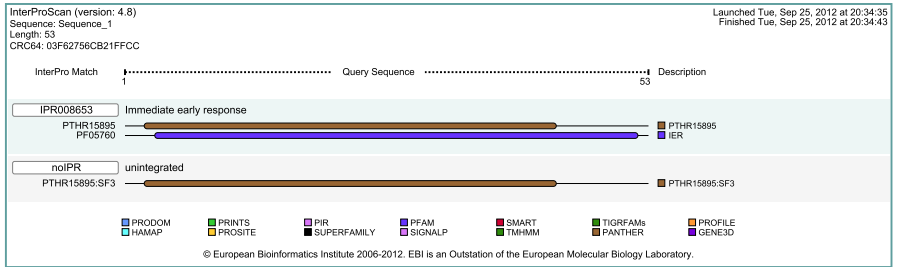

*Homo sapiens*  
 NP\_057629.2  
 IER5

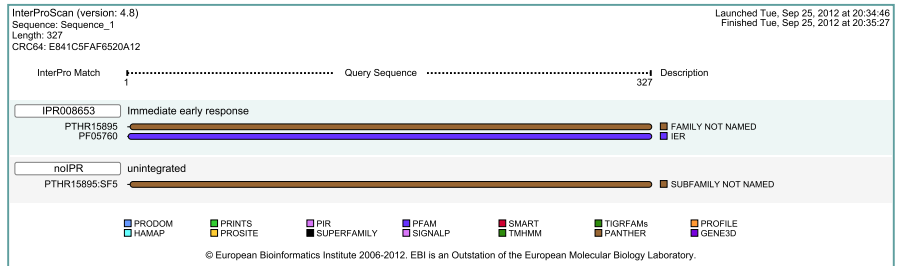

*Homo sapiens*  
 NP\_982258.2  
 IER5L

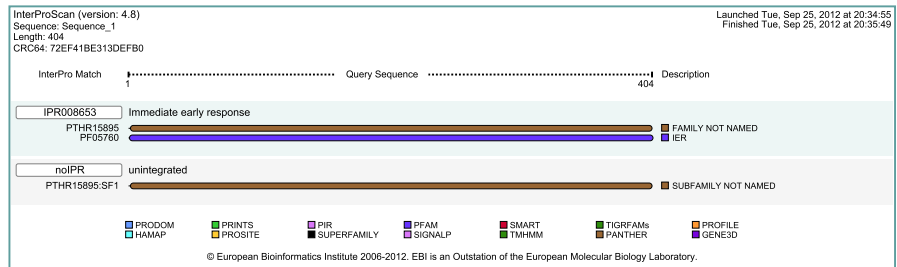

*Homo sapiens*  
 NP\_004898.2  
 IER2

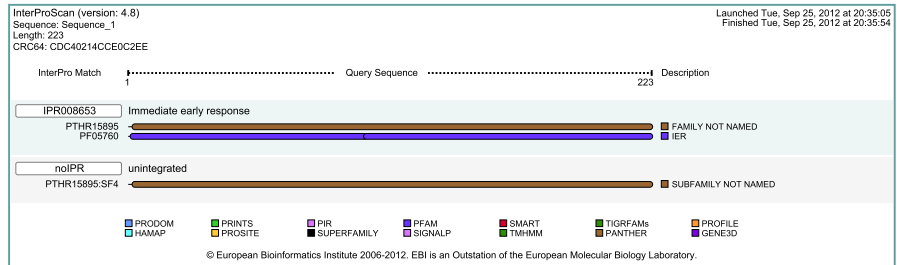

**Online Resource 3K.** Amphioxus sequence XP\_002609351.1 shares the conserved unique domain structure characteristic to the IER5, IER5L and IER2 MHC paralogon marker proteins in human and other vertebrates, although this is not supported by phylogenetic evidence.
