# Supplementary material
Source: PubMed Central journal article supplement (PMC3545050)
Supplement: NIHMS419773-supplement-251_2012_661_MOESM4_ESM.pdf [file NIHMS419773-supplement-251_2012_661_MOESM4_ESM.pdf]

# **R4 regulators of G protein signaling (RGS) identify a conserved genomic region that contains MHC-related markers**

**Jaanus Suurväli<sup>1</sup>, Jacques Robert<sup>2</sup>, Pierre Boudinot<sup>3</sup> and Sirje Rüütel Boudinot<sup>1</sup>**

<sup>1</sup>Department of Gene Technology, Tallinn University of Technology, Akadeemia tee 15, 12618 Tallinn, Estonia

<sup>2</sup> Department of Microbiology and Immunology, University of Rochester Medical Center, Rochester, NY 14642

<sup>3</sup> INRA, Molecular Virology and Immunology, Domaine de Vilvert, 78350 Jouy en Josas, France

Corresponding author:

Jaanus Suurväli

Tallinn University of Technology

Department of Gene Technology

Akadeemia tee 15, 12618 Tallinn, Estonia

phone: +372 620 4447

fax: +372 620 4401

e-mail: jaanus.suurvali@ttu.ee

## Online Resource 4.

This file contains expression data about some human *RGS1/RGS16* region genes.

**Online Resource 4A** – Representation of the publicly available microarray data from ArrayExpress for human *RGS1/RGS16* region genes *DHX9*, *IER5*, *MR1*, *NCF2*, *PTGS2* and *RGS16*. It can be seen that the expression of several of these genes is affected in the same direction in different experimental conditions and tissues, all involving viral/interferon challenge.

**Online Resource 4B** – Literature suggests that many genes in *RGS1/RGS16* surrounding are involved in immune/antiviral responses, at least in human and mouse.

**Online Resource 4A.** Gene Atlas expression data for selected genes of the *RGS1/RGS16* region. Genes marked with yellow on the figure are those present in the *RGS1/RGS16* region.

Genes 1-10 of 10 total found (you can [refine your query](#)) • [Download all results](#) • [JSON](#) [XML](#)  
 Legend:   - number of studies the gene is over/under expressed in (~ in experiment pop-ups indicates non-differential expression)

| Gene  | Ontology  |                       | Keywords    |                                       |                                      |                 |                                       |     |                  |             |           |                                |                             |                            |             |                           |                         |                         |                  |              |
|-------|-----------|-----------------------|-------------|---------------------------------------|--------------------------------------|-----------------|---------------------------------------|-----|------------------|-------------|-----------|--------------------------------|-----------------------------|----------------------------|-------------|---------------------------|-------------------------|-------------------------|------------------|--------------|
|       | HIV-1     | viral human hepatitis | hepatitis C | fibroblast post hepatic differenti... | stem cell post hepatic differenti... | interferon beta | interferon gamma m a + lipopolysac... | IFN | interferon alpha | hepatitis c | influenza | measles virus Chicago-1 strain | respiratory syncytial virus | influenza A virus infected | Dhori virus | herpes simplex virus C207 | Newcastle disease virus | hepatitis C virus JFH-1 | interferon gamma | IFNg-treated |
|       | cell type | clinic                | Compound    | disease                               | Infection                            | stim            | treat                                 |     |                  |             |           |                                |                             |                            |             |                           |                         |                         |                  |              |
| MR1   | 1         | 1                     | 1           | 1                                     | 1                                    | 1               | 1                                     | 2   | 1                | 1           | 1         | 1                              | 1                           | 1                          | 1           | 1                         | 1                       | 1                       | 1                | 1            |
| GDE1  | 1         | 1                     | 1           | 1                                     | 1                                    | 1               | 1                                     | 1   | 1                | 1           | 1         | 1                              | 1                           | 1                          | 1           | 1                         | 1                       | 1                       | 1                | 1            |
| STX6  | 1         | 1                     | 1           | 1                                     | 1                                    | 1               | 1                                     | 1   | 1                | 1           | 1         | 1                              | 1                           | 1                          | 1           | 1                         | 1                       | 1                       | 1                | 1            |
| PNKD  | 1         | 1                     | 1           | 1                                     | 1                                    | 1               | 1                                     | 1   | 1                | 1           | 1         | 1                              | 1                           | 1                          | 1           | 1                         | 1                       | 1                       | 1                | 1            |
| NCF2  | 1         | 1                     | 1           | 1                                     | 1                                    | 1               | 1                                     | 1   | 1                | 1           | 1         | 1                              | 1                           | 1                          | 1           | 1                         | 1                       | 1                       | 1                | 1            |
| IER5  | 1         | 1                     | 1           | 1                                     | 1                                    | 1               | 1                                     | 1   | 1                | 1           | 1         | 1                              | 1                           | 1                          | 1           | 1                         | 1                       | 1                       | 1                | 1            |
| RGS16 | 1         | 1                     | 1           | 1                                     | 1                                    | 1               | 1                                     | 1   | 1                | 1           | 1         | 1                              | 1                           | 1                          | 1           | 1                         | 1                       | 1                       | 1                | 1            |
| PTGS2 | 1         | 1                     | 1           | 1                                     | 1                                    | 1               | 1                                     | 1   | 1                | 1           | 1         | 1                              | 1                           | 1                          | 1           | 1                         | 1                       | 1                       | 1                | 1            |
| RGS5  | 1         | 1                     | 1           | 1                                     | 1                                    | 1               | 1                                     | 1   | 1                | 1           | 1         | 1                              | 1                           | 1                          | 1           | 1                         | 1                       | 1                       | 1                | 1            |
| IER5L | 1         | 1                     | 1           | 1                                     | 1                                    | 1               | 1                                     | 1   | 1                | 1           | 1         | 1                              | 1                           | 1                          | 1           | 1                         | 1                       | 1                       | 1                | 1            |

**Online Resource 4B.** Genes of the *RGS1/RGS16* region are involved in immune mechanisms.

|                                 |                                                                                                                                                                                                                                                                                                                                                                                                                                        |
|---------------------------------|----------------------------------------------------------------------------------------------------------------------------------------------------------------------------------------------------------------------------------------------------------------------------------------------------------------------------------------------------------------------------------------------------------------------------------------|
| <i>CFH</i>                      | The complement factor gene <i>CFH</i> is differentially modulated by IFNg (Brooimans et al. 1990; Kim et al. 2009, Luo et al. 2012). <i>CFHR4</i> , one of the <i>CFH</i> paralogues located next to it, has been shown to be significantly upregulated by a viral infection (Miyazaki et al. 2011).                                                                                                                                   |
| <i>NCF2</i> and <i>GLRX2</i>    | Interferon-inducible gene <i>NCF2</i> (Eklund and Kakar 1999) encodes p67phox, a subunit of NADPH oxidase, which produces superoxide and leads to oxidative burst during bacterial and viral infections. One of the enzymes protecting cells against the harmful effects of oxidative stress is mitochondrial glutaredoxin 2, encoded by the gene <i>GLRX2</i> which is also located in the <i>RGS1/RGS16</i> region (Wu et al. 2011). |
| <i>PLA2G4A</i> and <i>PTGS2</i> | <i>PLA2G4A</i> and <i>PTGS2</i> are enzymes directly responsible for prostaglandin production. Prostaglandins are involved in immune activation and inhibit interferon production in response to viral infections, as can be seen by the ability of acetylsalicylic acid (Aspirin) and other COX2 inhibitors to increase the production of interferon (Cesario et al. 1989).                                                           |
| <i>TPR</i>                      | <i>TPR</i> mediates the translocation of the product of interferon-inducible mouse gene <i>Iff204</i> from cytoplasmic to the nuclear compartment following IFN treatment (De Andrea et al. 2002).                                                                                                                                                                                                                                     |
| <i>EDEM3</i>                    | The knockdown of <i>EDEM3</i> results in increased virus production as it participates in the ER-associated degradation pathway and has been shown to be required for the ubiquitinylation and subsequent degradation of the glycoproteins of many viruses (Saeed et al. 2011).                                                                                                                                                        |
| <i>APOBEC4</i>                  | <i>APOBEC4</i> is a member of the AID/APOBEC family of polynucleotide (deoxy)cytidine deaminases. Members of this family have been shown to inhibit viral replication (Mangeat                                                                                                                                                                                                                                                         |

|            |                                                                                                                                                                                                                                                                                                                                                                                                                                                                                                                                                                                                                                                      |
|------------|------------------------------------------------------------------------------------------------------------------------------------------------------------------------------------------------------------------------------------------------------------------------------------------------------------------------------------------------------------------------------------------------------------------------------------------------------------------------------------------------------------------------------------------------------------------------------------------------------------------------------------------------------|
|            | et al. 2003; Noguchi et al. 2007; Rosler et al. 2005; Yu et al. 2004), and are thus inducible by both type I and II interferon, and by viruses themselves (Miyazaki et al. 2011; Noguchi et al. 2007).                                                                                                                                                                                                                                                                                                                                                                                                                                               |
| DHX9       | <i>DHX9</i> encodes RNA helicase A, which is a sensor for viral dsRNA in myeloid dendritic cells when bound to IPS-1 (Zhang et al. 2011), and can recognize DNA viruses in plasmacytoid dendritic cells (Kim et al. 2010). Knockdown of this gene significantly reduces the ability of dendritic cells to produce type I interferon and proinflammatory cytokines in response to RNA viruses (Zhang et al. 2011). In fact, RNA helicase A implication in virus/host interactions is complex since it is required for efficient replication of different viruses such as influenza, HIV and HCV (Fujii et al. 2001; He et al. 2008; Lin et al. 2012). |
| RNaseL     | RNase L is one of the best-studied interferon-induced antiviral effectors and has the ability to cleave single-stranded RNA. Also, small RNAs produced by RNase L activity may modulate IFN $\beta$ signaling, and RNase L may be also implicated in protecting the central nervous system against virus-induced demyelination (reviewed by Chakrabarti et al. 2011).                                                                                                                                                                                                                                                                                |
| IER5       | IER5 (immediate early response 5) mediates cellular responses to mitogenic signals (Williams et al. 1999).                                                                                                                                                                                                                                                                                                                                                                                                                                                                                                                                           |
| MR1        | The gene <i>MR1</i> encodes a non-classical conserved MHC molecule which mediates cell activation through antigen presentation (Huang et al. 2005).                                                                                                                                                                                                                                                                                                                                                                                                                                                                                                  |
| STX6       | STX6 (syntaxin 6) is a SNARE (Soluble NSF Attachment protein REceptor) that regulates several key processes often involved in antiviral responses such as chemotactic cell migration, integrin trafficking, exocytosis, proliferation and survival (Murray et al. 2005; Riggs et al. 2012; Zhang et al. 2008).                                                                                                                                                                                                                                                                                                                                       |
| AL359853.2 | The product of AL359853.2 is also known as interferon responsive gene 15 and thus responds to interferon.                                                                                                                                                                                                                                                                                                                                                                                                                                                                                                                                            |

## References

- Brooimans RA, van der Ark AA, Buurman WA, van Es LA, Daha MR (1990) Differential regulation of complement factor H and C3 production in human umbilical vein endothelial cells by IFN-gamma and IL-1. *J Immunol* 144:3835-40
- Cesario TC, Yousefi S, Carandang G (1989) The regulation of interferon production by aspirin, other inhibitors of the cyclooxygenase pathway and agents influencing calcium channel flux. *Bull N Y Acad Med* 65:26-35
- Chakrabarti A, Jha BK, Silverman RH (2011) New insights into the role of RNase L in innate immunity. *J Interferon Cytokine Res* 31:49-57
- De Andrea M, Zannetti C, Noris E, Gariglio M, Azzimonti B, Landolfo S (2002) The mouse interferon-inducible gene Ifi204 product interacts with the Tpr protein, a component of the nuclear pore complex. *J Interferon Cytokine Res* 22:1113-21
- Eklund EA, Kakar R (1999) Recruitment of CREB-binding protein by PU.1, IFN-regulatory factor-1, and the IFN consensus sequence-binding protein is necessary for IFN-gamma-induced p67phox and gp91phox expression. *J Immunol* 163:6095-105
- Fujii R, Okamoto M, Aratani S, Oishi T, Ohshima T, Taira K, Baba M, Fukamizu A, Nakajima T (2001) A Role of RNA Helicase A in cis-Acting Transactivation Response Element-mediated Transcriptional Regulation of Human Immunodeficiency Virus Type 1. *J Biol Chem* 276:5445-51
- He QS, Tang H, Zhang J, Truong K, Wong-Staal F, Zhou D (2008) Comparisons of RNAi approaches for validation of human RNA helicase A as an essential factor in hepatitis C virus replication. *J Virol Methods* 154:216-9
- Huang S, Gilfillan S, Cella M, Miley MJ, Lantz O, Lybarger L, Fremont DH, Hansen TH (2005) Evidence for MR1 antigen presentation to mucosal-associated invariant T cells. *J Biol Chem* 280:21183-93
- Kim T, Pazhoor S, Bao M, Zhang Z, Hanabuchi S, Facchinetti V, Bover L, Plumas J, Chaperot L, Qin J, Liu YJ (2010) Aspartate-glutamate-alanine-histidine box motif (DEAH)/RNA helicase A helicases sense microbial DNA in human plasmacytoid dendritic cells. *Proc Natl Acad Sci U S A* 107:15181-6
- Kim YH, He S, Kase S, Kitamura M, Ryan SJ, Hinton DR (2009) Regulated secretion of complement factor H by RPE and its role in RPE migration. *Graefes Arch Clin Exp Ophthalmol* 247:651-9
- Lin L, Li Y, Pyo HM, Lu X, Raman SN, Liu Q, Brown EG, Zhou Y (2012) Identification of RNA helicase A as a cellular factor that interacts with influenza A virus NS1 protein and its role in the virus life cycle. *J Virol* 86:1942-54
- Luo C, Chen M, Madden A, Xu H (2012) Expression of Complement Components and Regulators by Different Subtypes of Bone Marrow-Derived Macrophages. *Inflammation* 35:1448-61
- Mangeat B, Turelli P, Caron G, Friedli M, Perrin L, Trono D (2003) Broad antiretroviral defence by human APOBEC3G through lethal editing of nascent reverse transcripts. *Nature* 424:99-103
- Miyazaki D, Haruki T, Takeda S, Sasaki S, Yakura K, Terasaka Y, Komatsu N, Yamagami S, Touge H, Touge C, Inoue Y (2011) Herpes simplex virus type 1-induced transcriptional networks of corneal endothelial cells indicate antigen presentation function. *Invest Ophthalmol Vis Sci* 52:4282-93

- Murray RZ, Wylie FG, Khromykh T, Hume DA, Stow JL (2005) Syntaxin 6 and Vti1b form a novel SNARE complex, which is up-regulated in activated macrophages to facilitate exocytosis of tumor necrosis Factor- $\alpha$ . *J Biol Chem* 280:10478-83
- Noguchi C, Hiraga N, Mori N, Tsuge M, Imamura M, Takahashi S, Fujimoto Y, Ochi H, Abe H, Maekawa T, Yatsuji H, Shirakawa K, Takaori-Kondo A, Chayama K (2007) Dual effect of APOBEC3G on Hepatitis B virus. *J Gen Virol* 88:432-40
- Riggs KA, Hasan N, Humphrey D, Raleigh C, Nevitt C, Corbin D, Hu C (2012) Regulation of Integrin Endocytic Recycling and Chemotactic Cell Migration by Syntaxin 6 and VAMP3 Interaction. *J Cell Sci* [Epub ahead of print]
- Rosler C, Kock J, Kann M, Malim MH, Blum HE, Baumert TF, von Weizsacker F (2005) APOBEC-mediated interference with hepadnavirus production. *Hepatology* 42:301-9
- Saeed M, Suzuki R, Watanabe N, Masaki T, Tomonaga M, Muhammad A, Kato T, Matsuura Y, Watanabe H, Wakita T, Suzuki T (2011) Role of the endoplasmic reticulum-associated degradation (ERAD) pathway in degradation of hepatitis C virus envelope proteins and production of virus particles. *J Biol Chem* 286:37264-73
- Williams M, Lyu MS, Yang YL, Lin EP, Dunbrack R, Birren B, Cunningham J, Hunter K (1999) Ier5, a novel member of the slow-kinetics immediate-early genes. *Genomics* 55:327-34
- Wu H, Lin L, Giblin F, Ho YS, Lou MF (2011) Glutaredoxin 2 knockout increases sensitivity to oxidative stress in mouse lens epithelial cells. *Free Radic Biol Med* 51:2108-17
- Yu Q, Chen D, Konig R, Mariani R, Unutmaz D, Landau NR (2004) APOBEC3B and APOBEC3C are potent inhibitors of simian immunodeficiency virus replication. *J Biol Chem* 279:53379-86
- Zhang Z, Yuan B, Lu N, Facchinetti V, Liu YJ (2011) DHX9 pairs with IPS-1 to sense double-stranded RNA in myeloid dendritic cells. *J Immunol* 187:4501-8
- Zhang Y, Shu L, Chen X (2008) Syntaxin 6, a regulator of the protein trafficking machinery and a target of the p53 family, is required for cell adhesion and survival. *J Biol Chem* 283:30689-98
